# Supplementary material for: Correlation between Uniaxial Compression Test and Ultrasonic Pulse Rate in Cement with Different Pozzolanic Additions
Source: MDPI journal article supplement (doi:10.3390/app11093747), 2021-04-21
Supplement: s1 [file s1]

**Supplementary Materials:** Table S1: Ultrasonic Pulse Velocity and compressive strength results of all tested specimens.

| Specimens | Addition of 25% | Cured Time (days) | UPV (km/s) | Compressive Strength (MPa) |
|-----------|-----------------|-------------------|------------|----------------------------|
| 1A        | Z-7             | 7                 | 3.8        | 19.42                      |
| 1B        | Z-7             | 7                 | 3.8        | 19.01                      |
| 1C        | Z-7             | 7                 | 3.8        | 19.25                      |
| 2A        | Z-9             | 7                 | 3.9        | 28.38                      |
| 2B        | Z-9             | 7                 | 4.0        | 28.84                      |
| 2C        | Z-9             | 7                 | 3.9        | 28.51                      |
| 3A        | Z-12            | 7                 | 4.0        | 29.32                      |
| 3B        | Z-12            | 7                 | 4.0        | 27.86                      |
| 3C        | Z-12            | 7                 | 3.9        | 27.84                      |
| 4A        | Z-26            | 7                 | 4.0        | 26.28                      |
| 4B        | Z-26            | 7                 | 3.9        | 28.07                      |
| 4C        | Z-26            | 7                 | 3.9        | 28.03                      |
| 5A        | Z-7             | 28                | 4.21       | 31.07                      |
| 5B        | Z-7             | 28                | 4.19       | 30.41                      |
| 5C        | Z-7             | 28                | 4.20       | 30.80                      |
| 6A        | Z-9             | 28                | 4.19       | 45.41                      |
| 6B        | Z-9             | 28                | 4.17       | 46.14                      |
| 6C        | Z-9             | 28                | 4.20       | 45.61                      |
| 7A        | Z-12            | 28                | 4.24       | 46.92                      |
| 7B        | Z-12            | 28                | 4.17       | 44.58                      |
| 7C        | Z-12            | 28                | 4.10       | 44.55                      |
| 8A        | Z-26            | 28                | 4.16       | 42.05                      |
| 8B        | Z-26            | 28                | 4.17       | 44.92                      |
| 8C        | Z-26            | 28                | 4.21       | 44.85                      |
| 9A        | PM-1            | 28                | 4.13       | 40.35                      |
| 9B        | PM-1            | 28                | 4.06       | 41.90                      |
| 9C        | PM-1            | 28                | 4.04       | 39.53                      |
| 10A       | PM-3            | 28                | 4.06       | 29.83                      |
| 10B       | PM-3            | 28                | 4.03       | 30.59                      |
| 10C       | PM-3            | 28                | 4.03       | 29.73                      |
| 11A       | PMT-4           | 28                | 4.11       | 31.93                      |
| 11B       | PMT-4           | 28                | 4.10       | 32.19                      |
| 11C       | PMT-4           | 28                | 4.09       | 27.58                      |
| 12A       | ZEO-1           | 28                | 4.27       | 41.24                      |
| 12B       | ZEO-1           | 28                | 4.24       | 42.47                      |
| 12C       | ZEO-1           | 28                | 4.22       | 38.49                      |
| 13A       | CVM             | 28                | 4.24       | 38.19                      |
| 13B       | CVM             | 28                | 4.24       | 38.49                      |
| 13C       | CVM             | 28                | 4.28       | 39.00                      |
| 14A       | ZSA M-1         | 28                | 4.20       | 42.16                      |
| 14B       | ZSA M-1         | 28                | 4.27       | 40.92                      |
| 14C       | ZSA M-1         | 28                | 4.21       | 42.52                      |
| 15A       | GM-1            | 28                | 4.13       | 36.69                      |
| 15B       | GM-1            | 28                | 4.17       | 36.13                      |
| 15C       | GM-1            | 28                | 4.16       | 36.97                      |
| 16A       | --              | 28                | 4.43       | 57.31                      |
| 16B       | --              | 28                | 4.38       | 57.26                      |
| 16C       | --              | 28                | 4.40       | 56.61                      |
